# Supplementary material
Source: HighWire-hosted journal article supplement (https://cmaj.ca/highwire/filestream/148520/field_highwire_adjunct_files/2/220717-res-3-at.pdf)
Supplement: 220717-res-3-at.pdf [file 220717-res-3-at.pdf]

**Appendix 3 (as supplied by authors): Description of clinical characteristics**

**Table S2. HCV-related treatment regimens and their associated identification numbers searched in the Ontario Drug Benefit database.**

| Treatment                           | Drug Identification Numbers                                                                                                                                                        |
|-------------------------------------|------------------------------------------------------------------------------------------------------------------------------------------------------------------------------------|
| Direct Acting Antivirals            | 02370816, 02371448, 02371456, 02371464, 02371472, 02371553, 02416441, 02418355, 02432226, 02436027, 02444747, 02444755, 02447711, 02451131, 02452294, 02456370, 02467542, 02467550 |
| Interferon                          | 02223406, 02238674, 02238675, 02240693, 02240694, 02240695                                                                                                                         |
| Interferon-Ribavirin Combination    | 02239730, 02241159                                                                                                                                                                 |
| Peginterferon                       | 02242966, 02242967, 02242968, 02242969                                                                                                                                             |
| Peginterferon-Ribavirin Combination | 02246026, 02246027, 02246028, 02246029, 02246030, 02248077, 02248078, 02253410, 02253429, 02254581, 02254603, 02254638, 02254646                                                   |

Notes: Claims for any interferon, interferon-ribavirin combinations, peginterferon, and peginterferon-ribavirin combinations were combined into the interferon treatment regimen category in Appendix 6 Table S10.

**Table S3. Codes used to identify records of mental health and addiction disorders.**

| Diagnostic Group*                                    | ICD-9 codes (Used to search OMHRS)                                                                           | ICD-10 Codes (Used to search CIHI-DAD and CIHI-NACRS) | OHIP Diagnostic Code |
|------------------------------------------------------|--------------------------------------------------------------------------------------------------------------|-------------------------------------------------------|----------------------|
| Substance-related and addiction disorders            | 291.x, 292.x, 303.x, 304.x, 305.x, Provisional=16                                                            | F55, F10 to F19                                       | 303, 304             |
| Mood disorder                                        | 293.83, 296.x, 300.4x, 301.13, 311.x, 625.4, Provisional=3, 4                                                | F06.3, F30.x to F34.x, F38.x, F39.x, F53.0            | 296, 311             |
| Personality disorder                                 | 301, 301.0x, 301.2x, 301.4x, 301.5x, 301.6x, 301.7x, 301.81 to 301.83, 301.89, 301.9x, 310.1, Provisional=18 | F07.x, F21, F60, F61, F62, F68, F69                   | 301                  |
| Schizophrenia spectrum and other psychotic disorders | 293.81, 293.82, 295.x, 297.x, 298.x, Provisional=2                                                           | F06.0 to F06.2, F20, F22 to F29, F53.1                | 295, 297, 298        |
| Anxiety disorders                                    | 293.84, 300, 300.0x, 300.2x, 309.21, 313.23, Provisional=5                                                   | F06.4, F40, F41, F93.0 to F93.2, F94.0                | 300                  |
| Trauma/Stressor-related disorders                    | 308.3x, 309, 309.0x, 309.24, 309.28, 309.3x, 309.4x, 309.81, 309.89, 309.9x, 313.89, Provisional=7           | F43.x, F94.1, F94.2                                   | 309                  |
| Deliberate self harm                                 | -                                                                                                            | X60 to X84, Y10 to Y19, Y28*                          | -                    |

Notes: x represents all subcategories within the respective diagnosis code. Provisional represents broader provisional diagnoses categories found in OMHRS based on DSM-IV and DSM-V codes. Diagnostic group codes (with the exception of alcohol use disorder) were adapted from the Ontario Mental Health

and Addiction Scorecard (<https://www.ices.on.ca/Publications/Atlases-and-Reports/2018/MHASEF>). OMHRS, DAD and NACRS diagnostic category data did not start until 2002.

\*When primary diagnostic code was not F06 to F99

Abbreviations: CIHI, Canadian Institute for Health Information; DAD, Discharge Abstract Database; DSM, Diagnostic and Statistical Manual of Mental Disorders; ICD, International Classification of Diseases; NACRS, National Ambulatory Care Reporting System; OHIP, Ontario Health Insurance Plan; OMHRS, Ontario Mental Health Reporting System.

**Table S4. Codes used to identify records of HIV and/or HBV.**

| Flag | Database Searched                  | Codes Searched                                                                                                           |
|------|------------------------------------|--------------------------------------------------------------------------------------------------------------------------|
| HIV  | Ontario HIV Database               | Any record                                                                                                               |
|      | CIHI-DAD, CIHI-SDS, and CIHI-NACRS | ICD-9 diagnostic codes starting with: 042, 043, 044<br>ICD-10 diagnostic codes starting with: B20, B21, B22, B23, B24    |
| HBV  | CIHI-DAD, CIHI-SDS, and CIHI-NACRS | ICD-9 diagnostic codes: 070.2, 070.3<br>ICD-10 diagnostic codes: B16.0, B16.1, B16.2, B16.9, B17.0, B18.0, B18.1, Z22.50 |
|      | PHO Laboratory Testing Records     | Any positive HBV antibody or confirmatory test                                                                           |

Abbreviations: CIHI, Canadian Institute for Health Information; DAD, Discharge Abstract Database; HIV, human immunodeficiency virus; HBV, hepatitis B virus; ICD, International Classification of Diseases; PHO, Public Health Ontario; NACRS, National Ambulatory Care Reporting System; SDS, same day surgery database.

**Table S5. Codes used to identify cases of cirrhosis.**

| Databases Searched                 | Codes Searched                                                                                            |
|------------------------------------|-----------------------------------------------------------------------------------------------------------|
| OHIP*                              | Diagnostic code: 571                                                                                      |
| CIHI-DAD, CIHI-SDS, and CIHI-NACRS | ICD-9 diagnostic codes: 571.2, 571.5, 456.1<br>ICD-10 diagnostic codes: K70.3, K74.6, K71.7, I85.9, I98.2 |

Notes: The algorithm consisted of either matching the algorithm for decompensated cirrhosis (Appendix 2 Table S6) and/or having any diagnosis code for cirrhosis.

\*Used for decompensated cirrhosis algorithm (Appendix 2 Table S6)

Abbreviations: CIHI, Canadian Institute for Health Information; DAD, Discharge Abstract Database; ICD, International Classification of Diseases; NACRS, National Ambulatory Care Reporting System; SDS, same day surgery database.

**Table S6. Codes used to identify cases of decompensated cirrhosis.**

| Databases Searched                 | Codes Searched                                                                                                                                                                                                                                                   |
|------------------------------------|------------------------------------------------------------------------------------------------------------------------------------------------------------------------------------------------------------------------------------------------------------------|
| OHIP                               | Procedure billing codes: J057, Z591                                                                                                                                                                                                                              |
| CIHI-DAD, CIHI-SDS, and CIHI-NACRS | CCP codes: 1006, 6691<br>CCI codes: 1NA13BAFA, 1NA13BAX7, 1NA13BABD, 1KQ76GPNR, 1OT52HA<br>ICD-9 diagnostic codes: 572.2, 572.3, 572.4, 456.0, 456.2, 782.4, 789.5<br>ICD-10 diagnostic codes: K76.6, K76.7, R17, K72.1, K72.9, I85.0, I98.20, I98.3, I86.4, R18 |
| ORGD                               | ICD-9 codes for cause of death: 571.5, 571.2, 572.2, 572.3, 572.4, 572.8, 456.0<br>ICD-10 codes for cause of death: K72.1, K72.9, K70.3, K70.4, K71.7, K74, K74.6, K76.6, K76.7, I85, I98.2, I98.3, I86.4                                                        |

Notes: The algorithm consisted of one physician visit code for cirrhosis and any one of the hospital diagnosis, procedure, or cause of death codes.

Abbreviations: CIHI, Canadian Institute for Health Information; DAD, Discharge Abstract Database; CCI, Canadian Classification of Health Interventions; CCP, Canadian Classification of Procedures; ICD, International Classification of Diseases; NACRS, National Ambulatory Care Reporting System; ORGD, Office of the Registrar General Deaths register; SDS, same day surgery database.

**Table S7. Codes used to identify cases of hepatocellular carcinoma.**

| Databases Searched                 | Codes Searched                                                                        |
|------------------------------------|---------------------------------------------------------------------------------------|
| CIHI-DAD, CIHI-SDS, and CIHI-NACRS | ICD-9 diagnostic code: 155.0<br>ICD-10 diagnostic codes: C22.9, C22.0, 81703, 81803   |
| ORGD                               | ICD-9 code for cause of death: 155.0<br>ICD-10 codes for cause of death: 81703, 81803 |
| OCR                                | Topography: C22.0<br>Morphology: 81703, 81723, 81733, 81743, 81753, 81803             |

Notes: The algorithm consisted of a diagnosis in the Ontario Cancer Registry, a hospital diagnostic code, or a cause of death code. Diagnosis in the Ontario Cancer Registry (OCR) used the ICD-O coding system and consisted of one topography code and a 5-digit morphology code.

Abbreviations: CIHI, Canadian Institute for Health Information; DAD, Discharge Abstract Database; ICD, International Classification of Diseases; ICD-O, International Classification of Diseases- Oncology; NACRS, National Ambulatory Care Reporting System; OCR, Ontario Cancer Registry; ORGD, Office of the Registrar General Deaths register; SDS, same day surgery database.

**Table S8. Codes used to identify cases of liver transplant.**

| Databases Searched                 | Codes Searched                                                                                                                                                                      |
|------------------------------------|-------------------------------------------------------------------------------------------------------------------------------------------------------------------------------------|
| CIHI-DAD, CIHI-SDS, and CIHI-NACRS | ICD-9 diagnostic codes: V42.7, 996.82<br>ICD-10 diagnostic codes: Z94.4, T86.40, T86.41, T86.42, T86.43, T86.49, T86.9<br>CCI codes: 1OA85LAXXK, 1OA85VCXXK, 1OA85WLXXJ, 1OA85WLXXK |

Notes: The algorithm consisted of the presence of any of the diagnostic or procedure codes.  
Abbreviations: CIHI, Canadian Institute for Health Information; DAD, Discharge Abstract Database; CCI, Canadian Classification of Health Interventions; ICD, International Classification of Diseases; NACRS, National Ambulatory Care Reporting System; SDS, same day surgery database.
